# Supplementary material for: Fabrication of homogeneously Cu2+/La3+-doped CeO2nanosheets and their application in CO oxidation
Source: Royal Society of Chemistry journal article supplement (doi:10.1039/c7ta00924k), 2017-01-01
Supplement: c7ta00924k1.pdf [file c7ta00924k1.pdf]

## Fabrication of homogeneously Cu<sup>2+</sup>/La<sup>3+</sup>-doped CeO<sub>2</sub> nanosheets and their application in CO oxidation

Xia Zhou, Jun Ling\*, Weilin Sun\*, Zhiquan Shen

MOE Key Laboratory of Macromolecular Synthesis and Functionalization, Department of Polymer Science and Engineering, Zhejiang University, Hangzhou 310027, China

\*Correspondence authors: lingjun@zju.edu.cn (Jun Ling) and opl\_sunwl@zju.edu.cn (Weilin Sun)

### Supporting Information

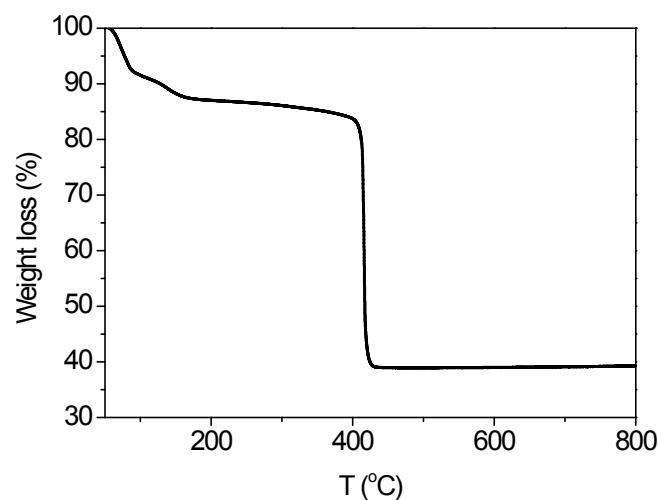

**Figure S1.** TGA curve of BTA-Ce with a ramp of 10 °C·min<sup>-1</sup> under air flow.

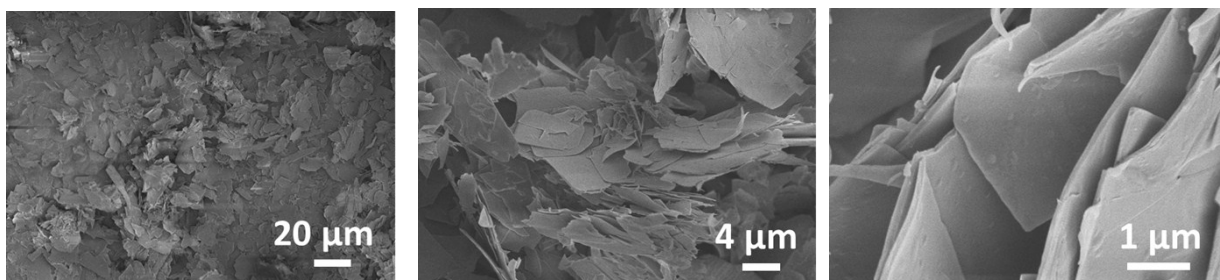

**Figure S2.** SEM images of BTA-Ce precursors under various magnifications.

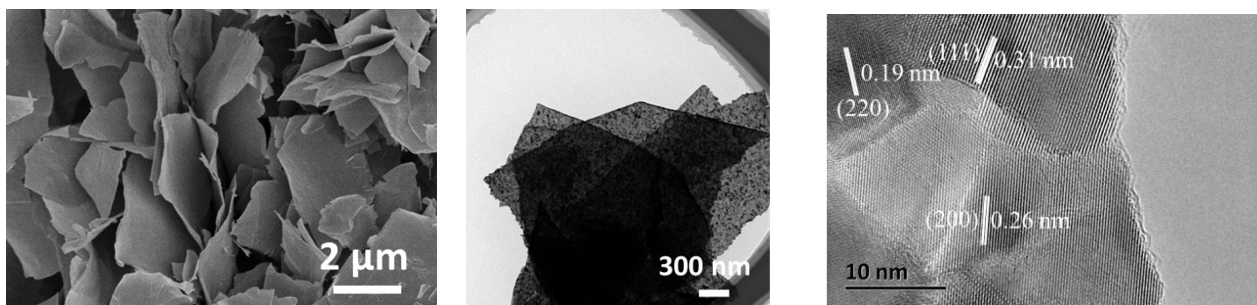

(a) (b) (c)  
**Figure S3.** SEM (a), TEM (b) and HRTEM (c) images of CeO<sub>2</sub>.

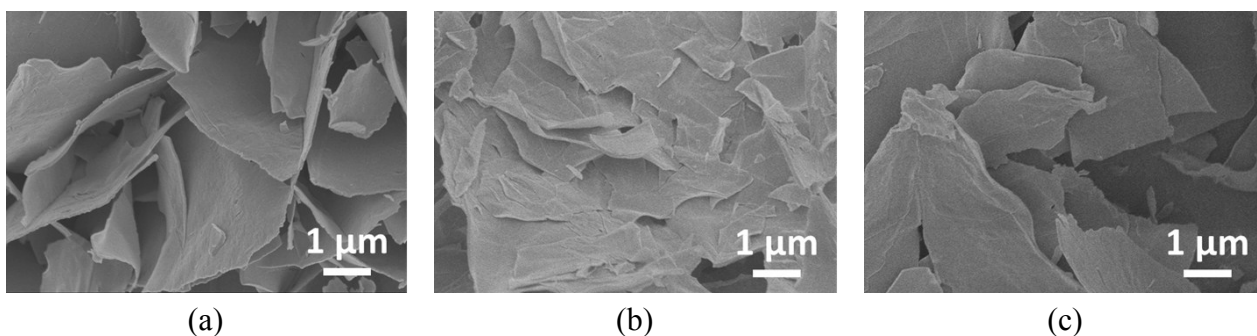

(a) (b) (c)  
**Figure S4.** SEM images of La<sub>0.05</sub>Ce<sub>0.95</sub>O<sub>2-δ</sub> (a), La<sub>0.1</sub>Ce<sub>0.9</sub>O<sub>2-δ</sub> (b) and Cu<sub>0.04</sub>Ce<sub>0.96</sub>O<sub>2-δ</sub> (c).

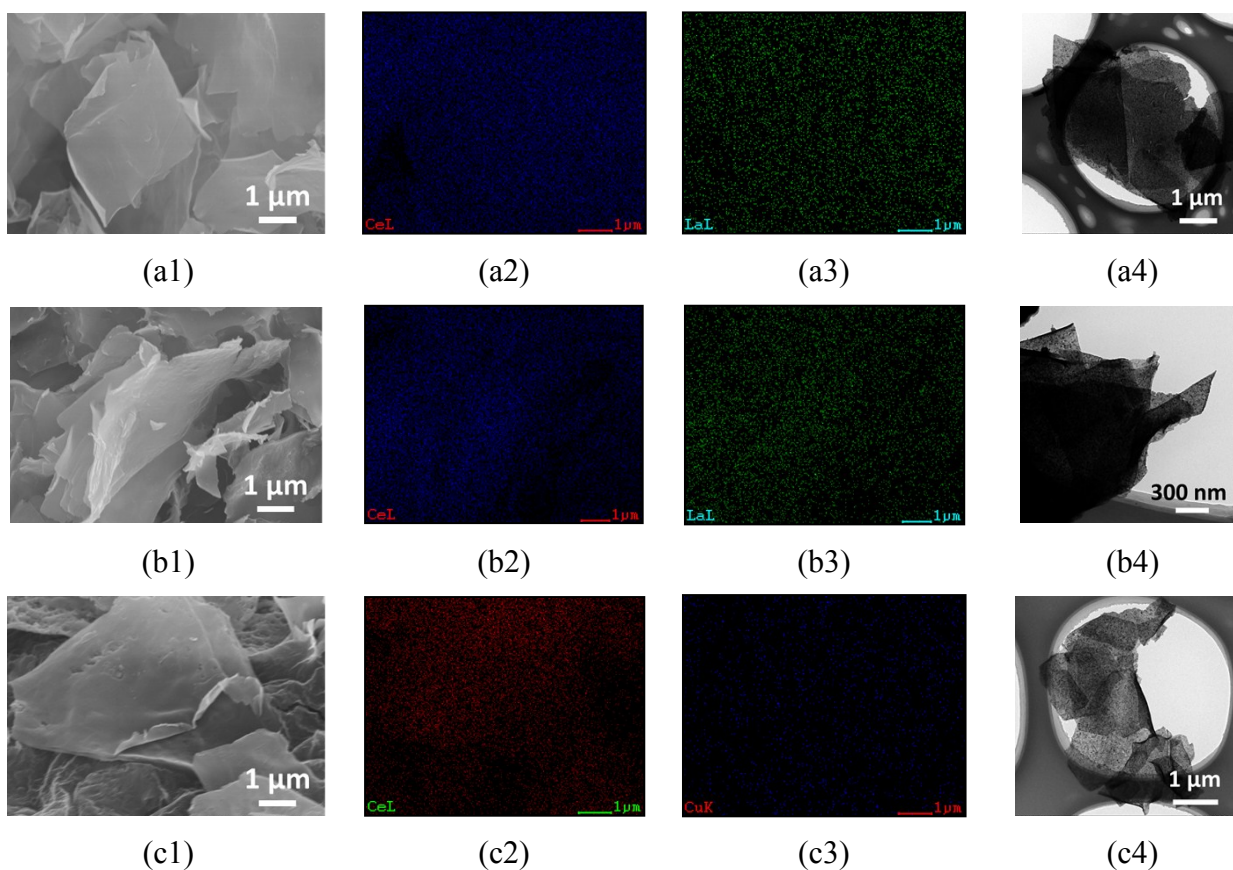

**Figure S5.** SEM images (1), mapping analyses of Ce (2) and La or Cu (3), and TEM images (4) of  $\text{La}_{0.05}\text{Ce}_{0.95}\text{O}_{2-\delta}$  (a),  $\text{La}_{0.1}\text{Ce}_{0.9}\text{O}_{2-\delta}$  (b) and  $\text{Cu}_{0.04}\text{Ce}_{0.96}\text{O}_{2-\delta}$  (c).

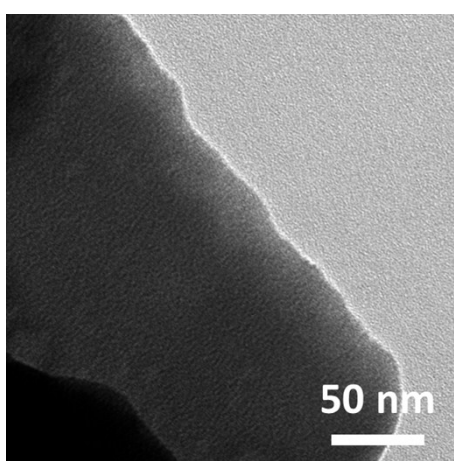

**Figure S6.** TEM images of CP precursor of  $\text{La}_{0.1}\text{Ce}_{0.9}\text{O}_{2-\delta}$ .

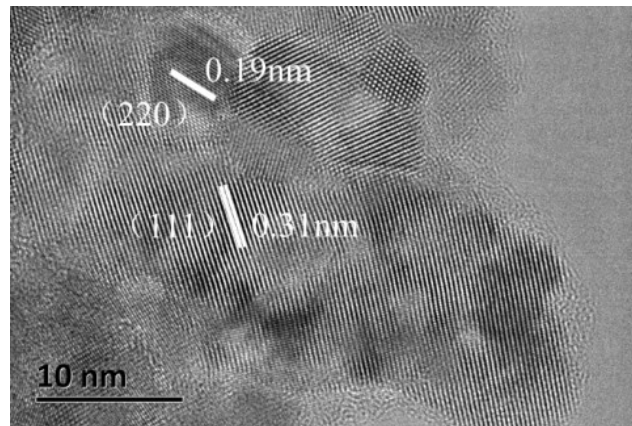

**Figure S7.** HRTEM images of  $\text{La}_{0.1}\text{Ce}_{0.9}\text{O}_{2-\delta}$ .

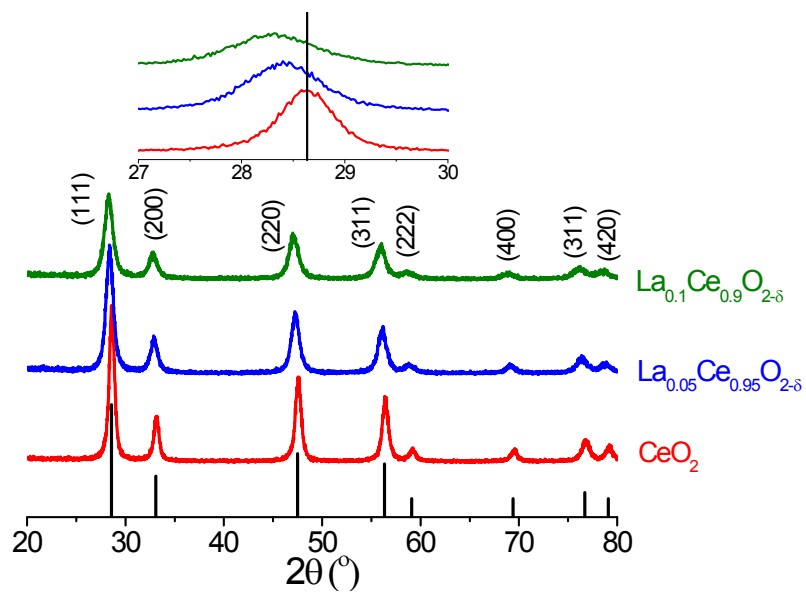

**Figure S8.** XRD patterns of La-doped ceria and theoretical pattern at bottom.

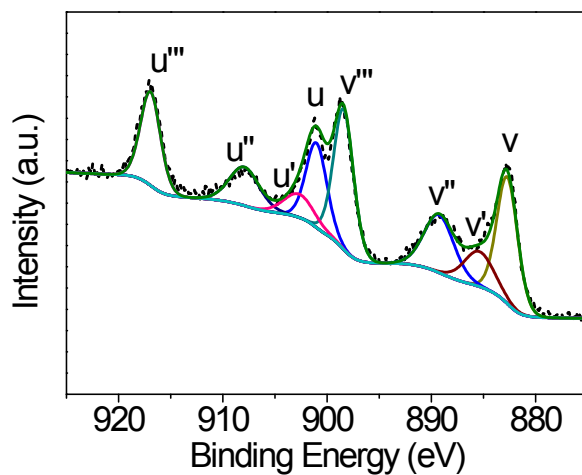

**Figure S9.** XPS spectra of Ce 3d in  $\text{Cu}_{0.1}\text{Ce}_{0.9}\text{O}_{2-\delta}$  after catalytic reaction.

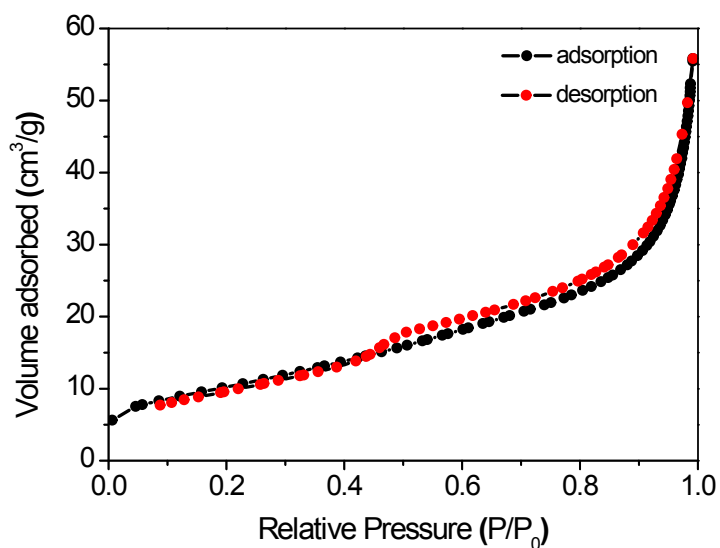

**Figure S10.** Nitrogen adsorption-desorption isotherm of ceria.

**Table S1.** Metal contents in the doped ceria detected by ICP-MS.

| Sample                                                | M  | M (mol%) | Ce (mol%) |
|-------------------------------------------------------|----|----------|-----------|
| $\text{La}_{0.05}\text{Ce}_{0.95}\text{O}_{2-\delta}$ | La | 4.7      | 95.3      |
| $\text{La}_{0.1}\text{Ce}_{0.9}\text{O}_{2-\delta}$   | La | 10.2     | 89.8      |
| $\text{Cu}_{0.04}\text{Ce}_{0.96}\text{O}_{2-\delta}$ | Cu | 4.0      | 96.0      |
| $\text{Cu}_{0.1}\text{Ce}_{0.9}\text{O}_{2-\delta}$   | Cu | 9.9      | 90.1      |
